# Supplementary material
Source: Springer Nature journal article supplement (https://www.springermedizin.de/resource/supplementary/12893_2012_563_MOESM2_ESM.pdf/9512654)

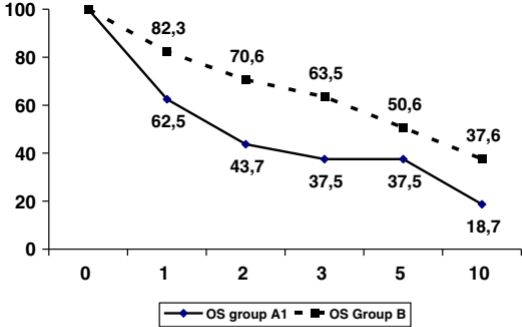

| Years | 0       | 1         | 2          | 3          | 5         | 10         |
|-------|---------|-----------|------------|------------|-----------|------------|
| A1    | 100%=16 | 62,5%=10  | 43,75%=7   | 37,5%=6    | 37,5%=6   | 18,75%=3   |
| B     | 100%=85 | 82,35%=75 | 70,588%=60 | 63,529%=54 | 50,58%=43 | 37,647%=32 |

Supplement: MOESM2 [file 9512654]
